# Supplementary material for: City-Level Travel Time and Individual Dietary Consumption in Latin American Cities: Results from the SALURBAL Study
Source: MDPI journal article supplement (doi:10.3390/ijerph192013443), 2022-10-18
Supplement: s1 [file s1]

**Supplementary Materials S1:** Questions and answers (translated to English) used to create days per week with vegetable consumption in the national health surveys, 2010–2016.

- **Chile (Encuesta Nacional de Salud—ENS2010)\* and Peru (Encuesta Nacional de Demografía y Salud—ENDES2016)\*\***

Question: “In a typical week, how many days do you eat vegetables?”

Response options: Number of days (continuous) ranging 0–7; or Don’t know/refused.

\* Specifically asks to not include potatoes and legumes.

\*\* Specifically asks only “vegetable salads”.

- **Brazil (Pesquisa Nacional de Saúde—PNS 2013)**

Question 1: “On how many days of the week do you usually eat salad or raw vegetables?”

Response options: Never or less than once per week; Number of days (continuous) ranging 1–7; or Don’t know/refused.

Question 2: “On how many days of the week do you usually eat cooked vegetables?”

Response options: Never or less than once per week; Number of days (continuous) ranging 1–7; or Don’t know/refused.

- **Colombia (Encuesta Nacional de la Situación Nutricional en Colombia—ENSIN2010)**

Question 1: “Usually in the last month do you eat cooked vegetables?”

Response Options: Yes—Go to Question 2; or No—Go to Question 3

Question 2: “How often do you eat cooked vegetables?”

Response Options: Less than once per month; Once a month; Two or three times per month; Once a week; Twice a week; Three or four times per week; Five or six times per week; Once a day; Twice a day; or Three times or more per day.

Question 3: “Usually in the last month do you eat raw vegetables?”

Response Options: Yes—Go to Question 4; No—End.

Question 4: “How often do you eat raw vegetables?”

Response options: Less than once per month; Once a month; Two or three times per month; Once a week; Twice a week; Three or four times per week; Five and six times per week; Once a day; Twice a day; or Three times or more per day.

- **Mexico (Encuesta Nacional de Salud y Nutrición—ENSANUT2012)**

Question (assessed using a Food frequency questionnaire): “How many days did you eat (type of vegetable)?” This question is repeated for each type of vegetable.

Response options: Never; 1 day; 2–4 days; 5–6 days; or 7 days.

**Supplementary Materials S2.** Questions and answers (translated to English) used to create days per week with sugar-sweetened beverages consumption in the national health surveys, 2010–2016.

- **Brazil (Pesquisa Nacional de Saúde—PNS 2013)**

Question 1: “How many days per week do you usually drink soda (or artificial juice)?”

Response options: Never or less than once per week; or Number of days ranging 1–7.

Question 2: “What type of soda or juice do you usually drink?”

Response options: Normal/regular; Diet/light/zero; or Both.

- **Colombia (Encuesta Nacional de la Situación Nutricional en Colombia—ENSIN2010)**

Question 1: “Usually in the last month do you consume soda or drinks (powder, in a box, or bottle)?”

Response Options: Yes—Go to Question 2; No—End.

Question 2: “How often do you consume soda?”

Response Options: Less than once per month; Once a month; Two or three times per month; Once a week; Twice a week; Three or four times per week; Five or six times per week; Once a day; Twice a day; Three times or more per day.

- **Mexico (Encuesta Nacional de Salud y Nutrición—ENSANUT2012)**

Question (assessed using a Food frequency questionnaire): “How many days did you consume (type of SSB)?” This question is repeated for each type of SSB. The SSBs included for calculation of days per week are: 1) regular soda; 2) fruit water with sugar; 3) industrialized drinks or flavored waters with sugar; 4) fruit nectars or industrialized fruit pulp with sugar. Additional beverages included for type of SSB usually consumed are 5) diet soda; 6) industrialized drinks or flavored waters without sugar.

Response options: Never; 1 day; 2–4 days; 5–6 days; or 7 days.
